# Supplementary material for: Potential use of alginate beads as a chondrocyte delivery vehicle and stepwise dissolving porogen in a hydrogel scaffold for cartilage tissue engineering
Source: Royal Society of Chemistry journal article supplement (doi:10.1039/c5ra15376j), 2015-01-01
Supplement: c5ra15376j1.pdf [file c5ra15376j1.pdf]

## Potential use of alginate bead as chondrocyte delivery vehicle and stepwisely dissolving porogen in hydrogel scaffold for cartilage tissue engineering

Changjiang Fan<sup>a,b</sup> and Dong-An Wang<sup>\*a</sup>

<sup>a</sup> Division of Bioengineering, School of Chemical and Biomedical Engineering, Nanyang Technological University, 70 Nanyang Drive, N1.3-B2-13, Singapore 637457, Singapore

<sup>b</sup> Institute for Translational Medicine, College of Medicine, Qingdao University, Qingdao, P. R. China

### Legends

**Fig. S1** (A) Synthesis of photocrosslinkable CS-MA precursor; (B) <sup>1</sup>H NMR spectrum of CS-MA precursor, where the peaks (B-a) belonging to acrylate protons (A-a) are shown by arrows.

**Fig. S2** Micrograph of alginate beads (a), and images of freshly prepared CS-ABG (b) and CS-MCG (c).

**Fig. S3** Representative dissolution of alginate bead by incubating it into 50 mM EDTA solution for 0 minute, 10 minutes, and plus 2 minutes, respectively. The volume of alginate bead becomes smaller in response to EDTA treatments.

**Fig. S4** Fluorescent images of chondrocytes encapsulated at the interior (a) and edge (b) of CS-G constructs after 21 days of culture.

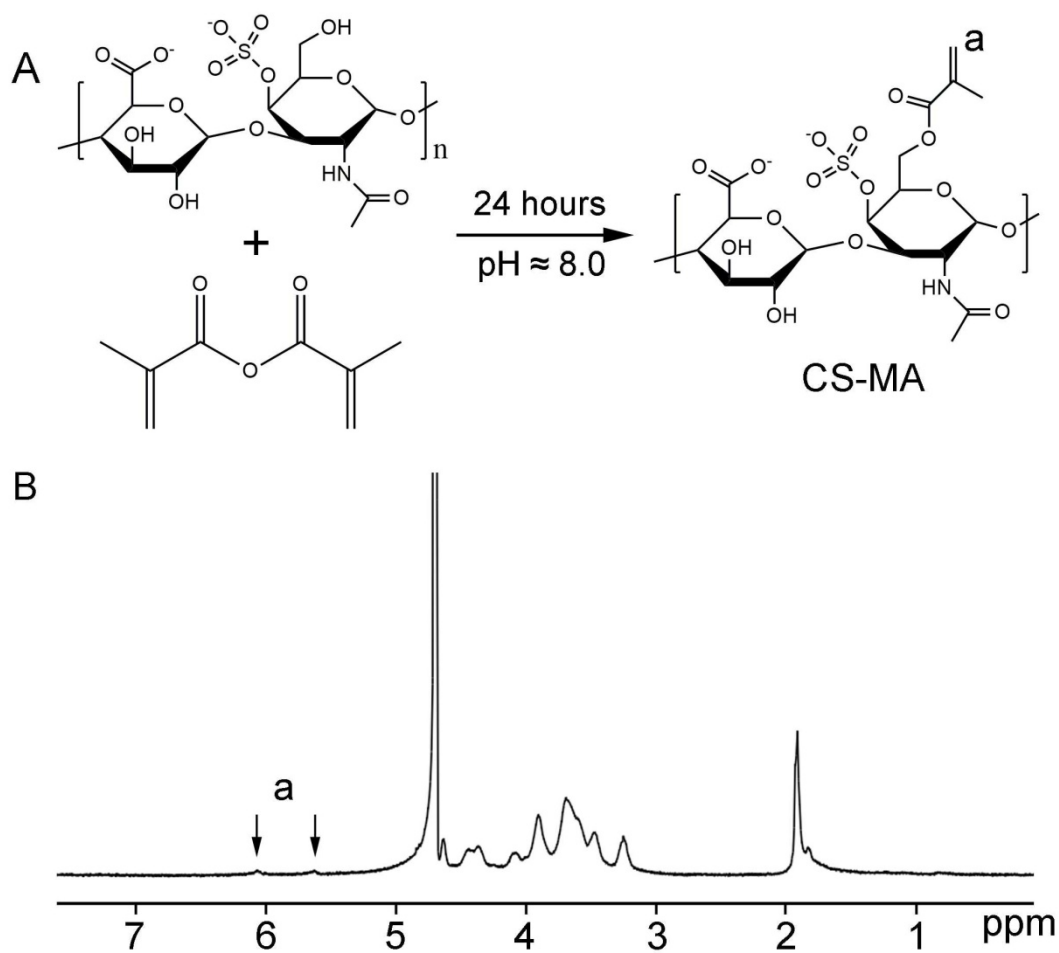

**Fig. S1** (A) Synthesis of photocrosslinkable CS-MA precursor; (B)  $^1\text{H}$  NMR spectrum of CS-MA precursor, where the peaks (B-a) belonging to acrylate protons (A-a) are shown by arrows.

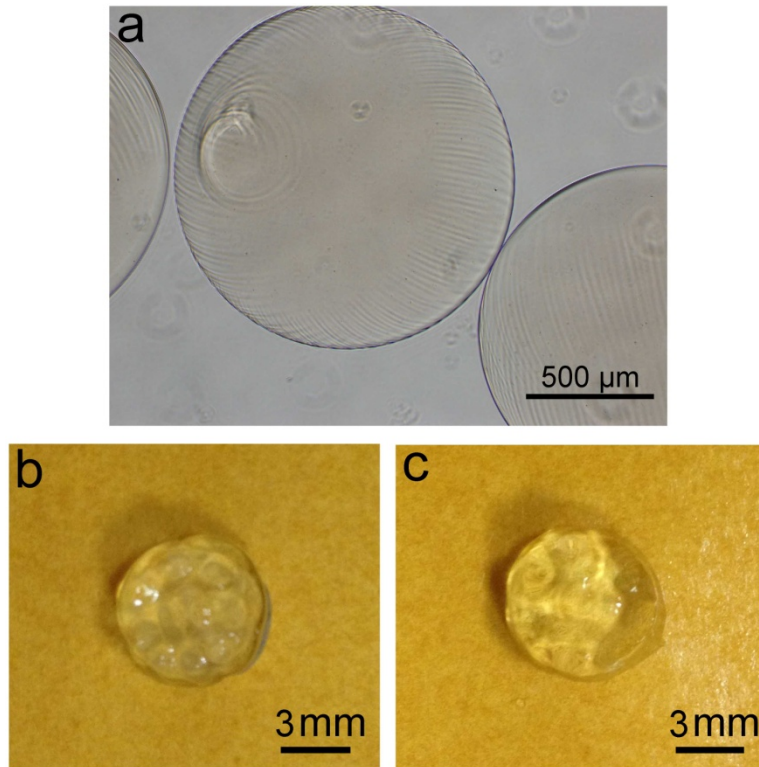

**Fig. S2** Micrograph of alginate beads (a), and images of freshly prepared CS-ABG (b) and CS-MCG (c).

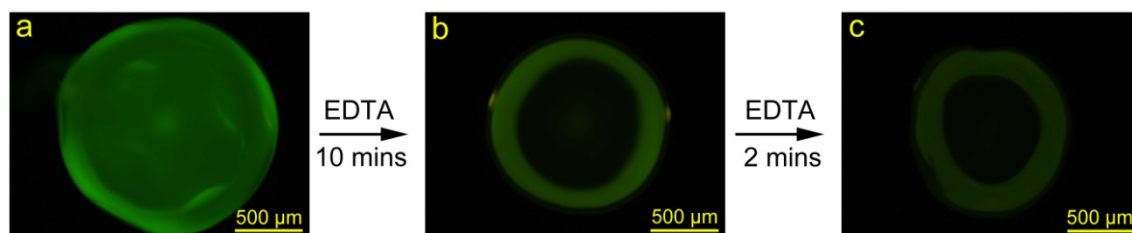

**Fig. S3** Representative dissolution of alginate bead by incubating it into 50 mM EDTA solution for 0 minute, 10 minutes, and plus 2 minutes, respectively. The volume of alginate bead becomes smaller in response to EDTA treatments.

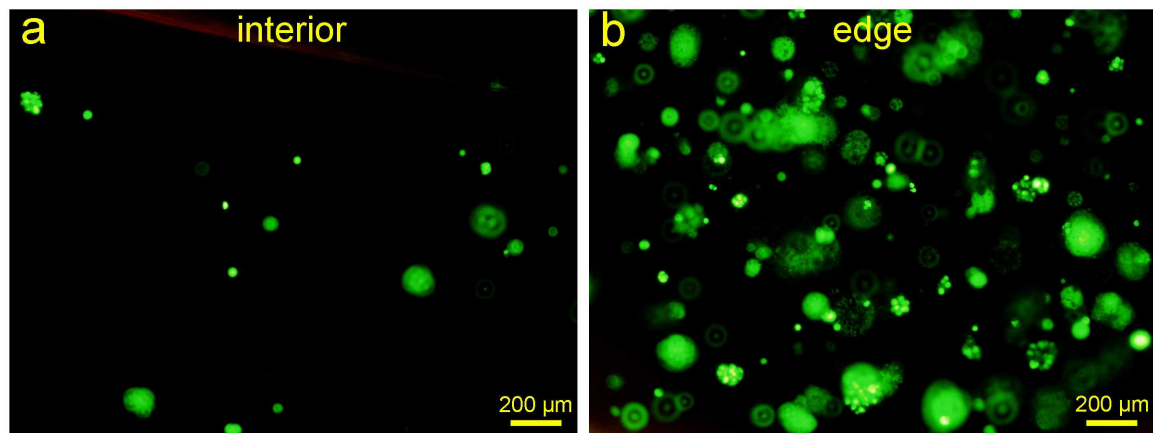

**Fig. S4** Fluorescent images of chondrocytes encapsulated at the interior (a) and edge (b) of CS-G constructs after 21 days of culture.
